# Supplementary material for: Stress Responses in Horses Housed in Different Stable Designs During Summer in a Tropical Savanna Climate
Source: Preprints.org preprint supplement (doi:10.20944/preprints202407.0973.v1), 2024-07-12
Supplement: Supplementary file 1 [file supplementary]

**Table S1.** Hydrogen sulfide (H<sub>2</sub>S) levels (ppm) inside stables at 1-hour intervals during a 24-hour period

| <b>Time</b>   | <b>Stable A</b> | <b>Stable B</b> | <b>Stable C</b> |
|---------------|-----------------|-----------------|-----------------|
| 7.00-8.00 h   | 0               | 0               | 0               |
| 8.00-9.00 h   | 0               | 0               | 0               |
| 9.00-10.00 h  | 0               | 0               | 0               |
| 10.00-11.00 h | 0               | 0               | 0               |
| 11.00-12.00 h | 0               | 0               | 0               |
| 12.00-13.00 h | 0               | 0               | 0               |
| 13.00-14.00 h | 0               | 0               | 0               |
| 14.00-15.00 h | 0               | 0               | 0               |
| 15.00-16.00 h | 0               | 0               | 0               |
| 16.00-17.00 h | 0               | 0               | 0               |
| 17.00-18.00 h | 0               | 0               | 0               |
| 18.00-19.00 h | 0               | 0               | 0               |
| 19.00-20.00 h | 0               | 0               | 0               |
| 20.00-21.00 h | 0               | 0               | 0               |
| 21.00-22.00 h | 0               | 0               | 0               |
| 22.00-23.00 h | 0               | 0               | 0               |
| 23.00-00.00 h | 0               | 0               | 0               |
| 00.00-01.00 h | 0               | 0               | 0               |
| 01.00-02.00 h | 0               | 0               | 0               |
| 02.00-03.00 h | 0               | 0               | 0               |
| 03.00-04.00 h | 0               | 0               | 0               |
| 04.00-05.00 h | 0               | 0               | 0               |
| 05.00-06.00 h | 0               | 0               | 0               |
| 06.00-07.00 h | 0               | 0               | 0               |

**Table S2.** Methane (NH<sub>4</sub>) level (%LEL) inside stables at 1-hour intervals during a 24-hour period

| <b>Time</b>          | <b>Stable A</b> | <b>Stable B</b> | <b>Stable C</b> |
|----------------------|-----------------|-----------------|-----------------|
| <b>7.00-8.00 h</b>   | 0               | 0               | 0               |
| <b>8.00-9.00 h</b>   | 0               | 0               | 0               |
| <b>9.00-10.00 h</b>  | 0               | 0               | 0               |
| <b>10.00-11.00 h</b> | 0               | 0               | 0               |
| <b>11.00-12.00 h</b> | 0               | 0               | 0               |
| <b>12.00-13.00 h</b> | 0               | 0               | 0               |
| <b>13.00-14.00 h</b> | 0               | 0               | 0               |
| <b>14.00-15.00 h</b> | 0               | 0               | 0               |
| <b>15.00-16.00 h</b> | 0               | 0               | 0               |
| <b>16.00-17.00 h</b> | 0               | 0               | 0               |
| <b>17.00-18.00 h</b> | 0               | 0               | 0               |
| <b>18.00-19.00 h</b> | 0               | 0               | 0               |
| <b>19.00-20.00 h</b> | 0               | 0               | 0               |
| <b>20.00-21.00 h</b> | 0               | 0               | 0               |
| <b>21.00-22.00 h</b> | 0               | 0               | 0               |
| <b>22.00-23.00 h</b> | 0               | 0               | 0               |
| <b>23.00-00.00 h</b> | 0               | 0               | 0               |
| <b>00.00-01.00 h</b> | 0               | 0               | 0               |
| <b>01.00-02.00 h</b> | 0               | 0               | 0               |
| <b>02.00-03.00 h</b> | 0               | 0               | 0               |
| <b>03.00-04.00 h</b> | 0               | 0               | 0               |
| <b>04.00-05.00 h</b> | 0               | 0               | 0               |
| <b>05.00-06.00 h</b> | 0               | 0               | 0               |
| <b>06.00-07.00 h</b> | 0               | 0               | 0               |

**Table S3.** Carbon monoxide (CO) levels (ppm) inside stables at 1-hour intervals during a 24-hour period

| <b>Time</b>          | <b>Stable A</b> | <b>Stable B</b> | <b>Stable C</b> |
|----------------------|-----------------|-----------------|-----------------|
| <b>7.00-8.00 h</b>   | 0               | 0               | 0               |
| <b>8.00-9.00 h</b>   | 0               | 0               | 0               |
| <b>9.00-10.00 h</b>  | 0               | 0               | 0               |
| <b>10.00-11.00 h</b> | 0               | 0               | 0               |
| <b>11.00-12.00 h</b> | 0               | 0               | 0               |
| <b>12.00-13.00 h</b> | 0               | 0               | 0               |
| <b>13.00-14.00 h</b> | 0               | 0               | 0               |
| <b>14.00-15.00 h</b> | 0               | 0               | 0               |
| <b>15.00-16.00 h</b> | 0               | 0               | 0               |
| <b>16.00-17.00 h</b> | 0               | 0               | 0               |
| <b>17.00-18.00 h</b> | 0               | 0               | 0               |
| <b>18.00-19.00 h</b> | 0               | 0               | 0               |
| <b>19.00-20.00 h</b> | 0               | 0               | 0               |
| <b>20.00-21.00 h</b> | 0               | 0               | 0               |
| <b>21.00-22.00 h</b> | 0               | 0               | 0               |
| <b>22.00-23.00 h</b> | 0               | 0               | 0               |
| <b>23.00-00.00 h</b> | 0               | 0               | 0               |
| <b>00.00-01.00 h</b> | 0               | 0               | 0               |
| <b>01.00-02.00 h</b> | 0               | 0               | 0               |
| <b>02.00-03.00 h</b> | 0               | 0               | 0               |
| <b>03.00-04.00 h</b> | 0               | 0               | 0               |
| <b>04.00-05.00 h</b> | 0               | 0               | 0               |
| <b>05.00-06.00 h</b> | 0               | 0               | 0               |
| <b>06.00-07.00 h</b> | 0               | 0               | 0               |

**Table S4.** Oxygen (O<sub>2</sub>) (%) inside stables at 1-hour intervals during a 24-hour period

| <b>Time</b>          | <b>Stable A</b> | <b>Stable B</b> | <b>Stable C</b> |
|----------------------|-----------------|-----------------|-----------------|
| <b>7.00-8.00 h</b>   | 20.9            | 20.9            | 20.9            |
| <b>8.00-9.00 h</b>   | 20.9            | 20.9            | 20.9            |
| <b>9.00-10.00 h</b>  | 20.9            | 20.9            | 20.9            |
| <b>10.00-11.00 h</b> | 20.9            | 20.9            | 20.9            |
| <b>11.00-12.00 h</b> | 20.9            | 20.9            | 20.9            |
| <b>12.00-13.00 h</b> | 20.9            | 20.9            | 20.9            |
| <b>13.00-14.00 h</b> | 20.9            | 20.9            | 20.9            |
| <b>14.00-15.00 h</b> | 20.9            | 20.9            | 20.9            |
| <b>15.00-16.00 h</b> | 20.9            | 20.9            | 20.9            |
| <b>16.00-17.00 h</b> | 20.9            | 20.9            | 20.9            |
| <b>17.00-18.00 h</b> | 20.9            | 20.9            | 20.9            |
| <b>18.00-19.00 h</b> | 20.9            | 20.9            | 20.9            |
| <b>19.00-20.00 h</b> | 20.9            | 20.9            | 20.9            |
| <b>20.00-21.00 h</b> | 20.9            | 20.9            | 20.9            |
| <b>21.00-22.00 h</b> | 20.9            | 20.9            | 20.9            |
| <b>22.00-23.00 h</b> | 20.9            | 20.9            | 20.9            |
| <b>23.00-00.00 h</b> | 20.9            | 20.9            | 20.9            |
| <b>00.00-01.00 h</b> | 20.9            | 20.9            | 20.9            |
| <b>01.00-02.00 h</b> | 20.9            | 20.9            | 20.9            |
| <b>02.00-03.00 h</b> | 20.9            | 20.9            | 20.9            |
| <b>03.00-04.00 h</b> | 20.9            | 20.9            | 20.9            |
| <b>04.00-05.00 h</b> | 20.9            | 20.9            | 20.9            |
| <b>05.00-06.00 h</b> | 20.9            | 20.9            | 20.9            |
| <b>06.00-07.00 h</b> | 20.9            | 20.9            | 20.9            |
